# Supplementary material
Source: MDPI journal article supplement (https://www.mdpi.com/2071-1050/10/1/96)
Supplement: s1 [file s1]

# Gardener well-being along social and biophysical landscape gradients

## Supplementary Tables and Figures

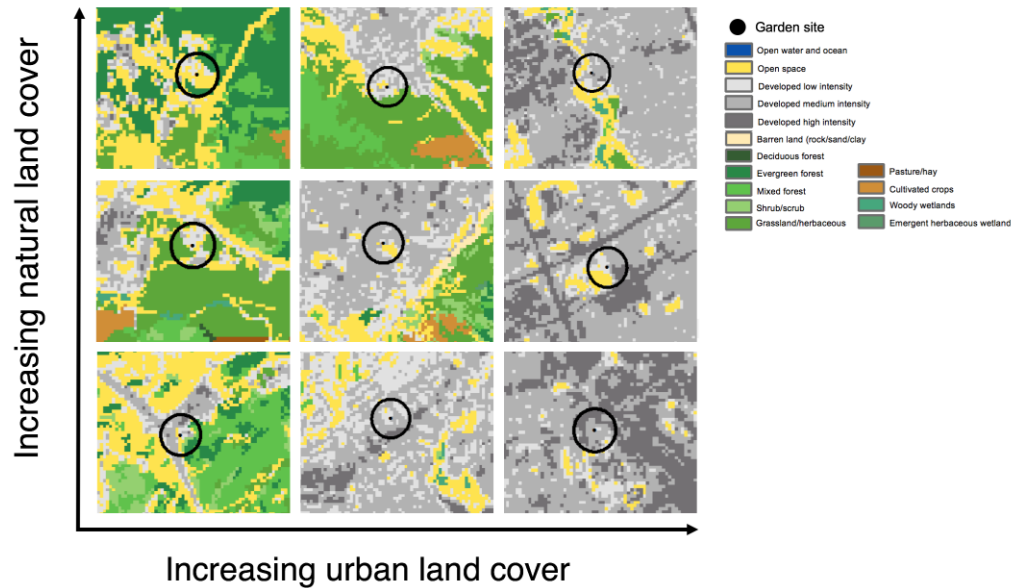

**Figure S1.** Garden research sites in the California central coast, USA, vary in surrounding amounts of natural land cover and urban land cover. Dominant land cover classes consist of urban developed, natural agricultural, and open space land-uses. We present a matrix of 9 selected garden sites situated along a gradient of more natural land cover versus more urban land cover at a 1km spatial extent. The proportion of urban land cover increases along the horizontal axis, the proportion of natural land cover increases along the vertical axis. The points indicate garden sites, and circles indicate 200m buffer surrounding gardens (resolution 1:24 000).

**Table S1.** Well-being codes and their descriptors used to code gardener responses to the question: “how has gardening positively impacted you or your family’s well-being?”

| <b>Code</b>                    | <b>Descriptor of well-being code</b>                                                                                                                                                                                                                                                                              |
|--------------------------------|-------------------------------------------------------------------------------------------------------------------------------------------------------------------------------------------------------------------------------------------------------------------------------------------------------------------|
| Food                           | Gardeners make direct/indirect reference to food benefits derived from garden participation. This could include: increased access to organic fresh vegetables; cost savings; growing things they don't find in the store (or that are expensive in the store); knowing where their food comes from                |
| Community                      | Gardeners describe or give examples about the benefits of being a part of a group of gardeners (instead of just gardening alone)                                                                                                                                                                                  |
| Mental health                  | Gardeners express an influence that gardening has on their mental or psychological well-being (e.g., reduce stress, improve mental clarity)                                                                                                                                                                       |
| Physical health and recreation | Gardeners describe the influence that gardening has on their physical health and well-being, including physical movement and recreation. They may describe weight loss and disease mitigation as benefits of gardening. They reference increase nutrition/physical health in relation to eating vegetables/fruits |
| Connection to nature           | Gardeners describe connecting to or interacting with nature, biodiversity, the outdoors through gardening. Gardeners may talk about observations they make or how they feel after being outside.                                                                                                                  |
| Learning and knowledge         | Gardeners make direct/indirect reference to learning and/or sharing agricultural knowledge with or without other gardeners                                                                                                                                                                                        |
| Sharing                        | Gardeners specifically state that sharing is a benefit that they get from gardening. This could include knowledge sharing or food sharing or other material and non-material forms of exchange                                                                                                                    |
| Hobby                          | Gardeners associate gardening as a fun activity, something that they like to do in their free time.                                                                                                                                                                                                               |
| Family                         | Gardeners describe familial benefits or how the garden is a space for family interactions                                                                                                                                                                                                                         |
| Culture                        | Gardeners express that the garden is a place where they practice cultural traditions, learn about different cultures, and spend time with others of the same or different culture                                                                                                                                 |
| Personal satisfaction          | Gardeners convey that gardening offers them a sense of accomplishment that is rewarding. This personal satisfaction may be related to watching things grow that they cared for                                                                                                                                    |

**Table S2.** Physical landscape features (at 5 km) and neighborhood social opportunity measured via the ROI for each of the community gardens in this study in relation to the summary statistics (minimum, maximum, mean and standard deviation).

| Community Garden                                                               | County      | % Natural | % Open | % Urban | % Agriculture | Education | Economy | Housing | Health/ Env Quality | Civic life |
|--------------------------------------------------------------------------------|-------------|-----------|--------|---------|---------------|-----------|---------|---------|---------------------|------------|
| Aptos Community Garden                                                         | Santa Cruz  | 43.4      | 19.7   | 12.0    | 1.4           | 42.5      | 12.0    | 47.4    | 10.2                | 90.9       |
| Beach Flats Community Garden                                                   | Santa Cruz  | 14.8      | 14.0   | 35.2    | 0.8           | 57.9      | 15.4    | 30.5    | 59.1                | 70.9       |
| Berryessa San Jose Community Garden                                            | Santa Clara | 2.7       | 7.9    | 89.4    | 0.0           | 45.3      | 18.0    | 51.2    | 18.6                | 82.4       |
| Charles Street Gardens                                                         | Santa Clara | 0.0       | 6.6    | 93.4    | 0.0           | 64.0      | 21.8    | 50.2    | 28.7                | 85.6       |
| Coyote Creek San Jose Community Garden                                         | Santa Clara | 1.8       | 9.2    | 88.5    | 0.0           | 47.4      | 14.5    | 47.3    | 42.3                | 74.5       |
| Goodwill Garden                                                                | Monterey    | 24.0      | 14.6   | 27.9    | 0.9           | 51.0      | 10.6    | 47.7    | 7.2                 | 79.1       |
| Live Oak Grange Community Gardens                                              | Santa Cruz  | 18.7      | 15.5   | 34.9    | 0.0           | 49.6      | 15.7    | 45.4    | 61.4                | 76.8       |
| Green Thumb San Jose Community Garden                                          | Santa Clara | 0.1       | 5.7    | 94.0    | 0.0           | 54.1      | 18.4    | 30.8    | 10.2                | 72.6       |
| Guadalupe Garden San Jose Community Garden                                     | Santa Clara | 0.1       | 5.4    | 94.4    | 0.0           | 51.3      | 17.6    | 59.1    | 47.2                | 74.5       |
| La Colina San Jose Community Garden                                            | Santa Clara | 21.4      | 14.6   | 62.7    | 1.0           | 53.1      | 12.6    | 56.3    | 6.7                 | 89.4       |
| Laguna Seca San Jose Community Garden                                          | Santa Clara | 52.3      | 12.5   | 23.6    | 9.2           | 55.5      | 13.3    | 53.7    | 29.3                | 88.7       |
| Middlebury Institute of International Studies Our Green Thumb Community Garden | Monterey    | 21.5      | 18.6   | 24.5    | 0.0           | 59.9      | 17.5    | 37.5    | 61.4                | 76.8       |
| Pacific Grove Community Garden                                                 | Monterey    | 7.4       | 10.8   | 14.7    | 0.0           | 61.2      | 18.0    | 37.0    | 42.3                | 85.6       |
| Jardin de la Comunidad Pájaro                                                  | Santa Cruz  | 14.5      | 16.4   | 27.8    | 37.0          | 38.3      | 13.5    | 46.6    | 48.0                | 79.0       |
| El Jardin San Jose Community Garden                                            | Santa Clara | 0.7       | 7.4    | 91.5    | 0.0           | 40.8      | 15.3    | 41.5    | 45.8                | 69.7       |
| Mid-County Senior Center Garden                                                | Santa Cruz  | 24.8      | 15.0   | 29.8    | 0.0           | 52.5      | 15.3    | 43.3    | 57.0                | 84.9       |
| Trescony Garden                                                                | Santa Cruz  | 24.2      | 13.2   | 26.5    | 1.6           | 57.9      | 15.7    | 43.9    | 62.6                | 85.5       |
| Mi Jardin Verde                                                                | Santa Cruz  | 11.4      | 17.8   | 33.7    | 33.3          | 38.3      | 13.4    | 51.0    | 48.5                | 73.2       |
| <i>Min</i>                                                                     |             | 0.0       | 5.4    | 12.0    | 0.0           | 38.3      | 10.6    | 30.5    | 6.7                 | 69.7       |
| <i>Max</i>                                                                     |             | 52.3      | 19.7   | 94.4    | 37.0          | 64.0      | 21.8    | 59.1    | 62.6                | 90.9       |
| <i>Mean</i>                                                                    |             | 15.8      | 12.5   | 50.2    | 4.7           | 51.1      | 15.5    | 45.6    | 38.1                | 80.0       |
| <i>SD</i>                                                                      |             | 15.0      | 4.6    | 32.0    | 11.3          | 7.8       | 2.7     | 7.9     | 20.2                | 6.8        |
